# Supplementary material
Source: PubMed Central journal article supplement (PMC3418664)
Supplement: NIHMS393747-supplement-Supplementary_Table_S1.pdf [file NIHMS393747-supplement-Supplementary_Table_S1.pdf]

**SI Table 1.** Clinical parameters of enrolled HIV seopositive subjects.

| <b>Enrollment Nr.</b> | <b>viremia</b> | <b>CD4+ count</b> |
|-----------------------|----------------|-------------------|
| 1                     | <50            | 257               |
| 5                     | <50            | 532               |
| 7                     | 221            | 280               |
| 13                    | 139.000        | 74                |
|                       |                |                   |
| 3                     | >10000         | 77                |
| 6                     | 98.000         | 296               |
| 12                    | >700000        | 62                |
| 18                    | 88.600         | 204               |
