# Supplementary material
Source: PubMed Central journal article supplement (PMC3418664)
Supplement: NIHMS393747-supplement-Supplementary_Table_S2.pdf [file NIHMS393747-supplement-Supplementary_Table_S2.pdf]

**Table 2. Genes stimulated by LPS according to experimental group**

|                                                        |                |                                                                  | LPS |
|--------------------------------------------------------|----------------|------------------------------------------------------------------|-----|
| <b><u>Specific to normal volunteers only</u></b>       |                |                                                                  |     |
| Hs.118110                                              | BST2           | Bone marrow stromal cell antigen 2                               | ↑   |
| Hs.5353                                                | 843 CASP10     | CASPASE-10                                                       | ↓   |
| Hs.1799                                                | 912 CD1D       | CD1d molecule                                                    | ↓   |
| Hs.9688                                                | 11314 CMRF-35H | leukocyte membrane antigen                                       | ↓   |
| Hs.558446                                              | 10219 KLRG1    | Killer cell lectin-like receptor subfamily G, member 1           | ↓   |
| Hs.521903                                              | 4061 LY6E      | Lymphocyte antigen 6 complex, locus E                            | ↑   |
| Hs.523847                                              | 2537 IFI6      | Interferon, alpha-inducible protein 6                            | ↑   |
| Hs.436836                                              | 4599 MX1       | MxA=interferon-induced cellular resistance mediator protein      | ↑   |
| <b><u>Shared by all experimental groups</u></b>        |                |                                                                  |     |
| Hs.276770                                              | 1043 CD52      | CD52 molecule                                                    | ↓   |
| Hs.2128                                                | 1847 DUSP5     | DUSP5=dual specificity phosphatase 5                             | ↑   |
| Hs.406708                                              | 23547 LILRA4   | Leukocyte immunoglobulin-like receptor, subfamily A, member 4    | ↑   |
| Hs.474781                                              | 4689 NCF4      | Neutrophil cytosolic factor 4, 40kDa                             | ↓   |
|                                                        | PDGFRB         | platelet-derived growth factor receptor, b polypeptide           | ↑   |
|                                                        | IFI35          | interferon-induced protein 35                                    | ↑   |
| Hs.458414                                              | 10581 IFITM1   | Interferon-inducible protein 9-27                                | ↑   |
| Hs.458414                                              | 10581 IFITM2   | Interferon induced transmembrane protein 2 (1-8D)                | ↑   |
| Hs.166120                                              | IRF7           | Interferon regulatory factor 7                                   | ↑   |
| <b><u>Specific to HIV patients</u></b>                 |                |                                                                  |     |
| Hs.838                                                 | 941 CD80       | CD80=B7-1=CD28 and CTLA-4 counter-receptor 1                     | ↑   |
| Hs.528402                                              | 3600 IL15      | IL-15                                                            | ↑   |
| Hs.12503                                               | 3601 IL15RA    | IL-15 receptor alpha chain                                       | ↑   |
| Hs.76364                                               | 199 AIF1       | allograft-inflammatory factor-1=IFN g induced macrophage protein | ↓   |
| <b><u>Specific to HIV patients high viral load</u></b> |                |                                                                  |     |
| Hs.174944                                              | 952 CD38       | CD38                                                             | ↑   |
| Hs.246381                                              | 968 CD68       | CD68                                                             | ↓   |
| Hs.97199                                               | 22918 CD93     | CD93 molecule                                                    | ↑   |
| Hs.298654                                              | 1848 DUSP6     | Dual specificity phosphatase 6                                   | ↓   |
|                                                        | IL13RA1        | interleukin 13 receptor, alpha 1                                 | ↓   |
| Hs.375957                                              | 3689 ITGB2     | CD18=Integrin beta 2=leukocyte adhesion protein beta subunit     | ↓   |
| Hs.436066                                              | 7940 LST1      | Leukocyte specific transcript 1                                  | ↓   |
| Hs.83169                                               | 4312 MMP1      | Matrix metalloproteinase 1 (interstitial collagenase)            | ↑   |
| Hs.54673                                               | 8741 TNFSF13   | Tumor necrosis factor (ligand) superfamily, member 13            | ↓   |
|                                                        | TRAF2          | TNF receptor-associated factor 2                                 | ↑   |
| Hs.9963                                                | 7305 TYROBP    | TYRO protein tyrosine kinase binding protein                     | ↓   |
| Hs.351279                                              | 3108 HLA-DMA   | MHC Class II=DM alpha                                            | ↓   |
| Hs.534322                                              | 3123 HLA-DRB1  | Major histocompatibility complex, class II, DR beta 1            | ↓   |
| Hs.654406                                              | 3126 HLA-DRB4  | Major histocompatibility complex, class II, DR beta 4            | ↓   |
| Hs.20315                                               | 3434 IFIT1     | Interferon-induced 56-KDa protein                                | ↑   |
| Hs.437609                                              | 3433 IFIT2     | Interferon-induced protein with tetratricopeptide repeats 2      | ↑   |
|                                                        | ISG20          | interferon stimulated gene (20kD)                                | ↑   |
| <b><u>Specific to HIV patients low viral load</u></b>  |                |                                                                  |     |
| Hs.656286                                              | 6359 CCL15     | Chemokine (C-C motif) ligand 15                                  | ↑   |
| Hs.89690                                               | 2921 CXCL3     | GRO3=GRO gamma=MIP2 b=macrophage inflammatory protein-2 b        | ↑   |
| Hs.25333                                               | IL1R2          | Interleukin 1 receptor, type II                                  | ↓   |
| Hs.75182                                               | 4360 MRC1      | mannose receptor, C type 1                                       | ↓   |
| Hs.14623                                               | 10437 IFI30    | Interferon, gamma-inducible protein 30                           | ↓   |
| Hs.926                                                 | 4600 MX2       | MxB=interferon-induced cellular resistance mediator protein      | ↑   |
| Hs.414332                                              | 4939 OAS2      | 2'-5'-oligoadenylate synthetase 2, 69/71kDa                      | ↑   |
