# Supplementary material
Source: PubMed Central journal article supplement (PMC3418664)
Supplement: NIHMS393747-supplement-Supplementary_Table_S3.pdf [file NIHMS393747-supplement-Supplementary_Table_S3.pdf]

**Table 3. Genes stimulated by VLPs according to experimental group**

**Specific to normal volunteers only**

|           |       |          |                                                                 |   |
|-----------|-------|----------|-----------------------------------------------------------------|---|
| Hs.97199  | 22918 | CD93     | CD93 molecule                                                   | ▲ |
| Hs.78913  | 1524  | CX3CR1   | CX3CR1=chemokine (C-X3-C) receptor 1                            | ▼ |
| Hs.434481 | 4058  | LTK      | Leukocyte tyrosine kinase                                       | ▼ |
| Hs.87205  | 4064  | LY64     | RP105=TLR cooperating with TLR4 during LPS signaling in B cells | ▼ |
| Hs.434878 | 8771  | TNFRSF6B | Tumor necrosis factor receptor superfamily, member 6b, decoy    | ▲ |

**Shared by all experimental groups**

|           |       |        |                                                         |   |
|-----------|-------|--------|---------------------------------------------------------|---|
| Hs.478588 | 604   | BCL6   | B-cell CLL/lymphoma 6 (zinc finger protein 51)          | ▲ |
| Hs.512683 | 6349  | CCL3L1 | Chemokine (C-C motif) ligand 3-like 1                   | ▲ |
| Hs.75703  | 6351  | CCL4   | Chemokine (C-C motif) ligand 4                          | ▲ |
| Hs.251526 | 6354  | CCL7   | MCP-3=monocyte chemotactic protein-3=chemokine          | ▲ |
| Hs.1799   | 912   | CD1D   | CD1d molecule                                           | ▲ |
| Hs.89690  | 2921  | CXCL3  | GRO3=GRO gamma=MIP2 beta                                | ▲ |
| Hs.164021 | 6372  | CXCL6  | Chemokine (C-X-C motif) ligand 6                        | ▲ |
| Hs.534552 | 58191 | CXCL16 | CXCL16=TM CXC chemokine=ligand for HIV-coreceptor Bonzo | ▲ |
| Hs.171695 | 1843  | DUSP1  | dual specificity phosphatase 1=MKP-1=CL100              | ▲ |
|           |       | G0S2   | putative lymphocyte G0/G1 switch gene                   | ▲ |
| Hs.25333  |       | IL1R2  | Interleukin 1 receptor, type II                         | ▼ |
|           |       | IL3RA  | interleukin 3 receptor, alpha (low affinity)            | ▲ |

**Specific to HIV patients**

|           |      |       |                                                    |   |
|-----------|------|-------|----------------------------------------------------|---|
| Hs.414629 | 6357 | CCL13 | MCP-4=CC-chemokine expressed in dermal fibroblasts | ▲ |
|-----------|------|-------|----------------------------------------------------|---|

**Specific to HIV patients high viral load**

|           |       |         |                                                                           |   |
|-----------|-------|---------|---------------------------------------------------------------------------|---|
| Hs.448589 | 27063 | ANKRD1  | Cytokine inducible nuclear protein=cardiac ankyrin repeat protein         | ▲ |
| Hs.54460  | 6356  | CCL11   | eotaxin=Small inducible cytokine A11=chemokine                            | ▲ |
| Hs.840    | 3620  | INDO    | Indoleamine-pyrrole 2,3 dioxygenase                                       | ▲ |
|           |       | MMP19   | matrix metalloproteinase 19                                               | ▲ |
| Hs.211600 | 7128  | TNFAIP3 | A20=TNF $\alpha$ inducible, TRAF1,2 binding inhibitor of NF-kB activation | ▲ |

**Specific to HIV patients low viral load**

|           |     |      |                                                  |   |
|-----------|-----|------|--------------------------------------------------|---|
| Hs.472860 | 958 | CD40 | CD40 molecule, TNF receptor superfamily member 5 | ▲ |
|-----------|-----|------|--------------------------------------------------|---|

VLPs
