# Supplementary material
Source: PubMed Central journal article supplement (PMC3418664)
Supplement: NIHMS393747-supplement-Supplementary_Table_S5.pdf [file NIHMS393747-supplement-Supplementary_Table_S5.pdf]

**Table 5. Genes stimulated by LPS and VLPs according to experimental group**

|                                                        |              |                                                                   | LPS | VLPs |
|--------------------------------------------------------|--------------|-------------------------------------------------------------------|-----|------|
| <b><u>Specific to normal volunteers only</u></b>       |              |                                                                   |     |      |
| Hs.1239                                                | 290 ANPEP    | CD13=aminopeptidase N                                             | ▲   | ▲    |
| Hs.306278                                              | 960 CD44     | CD44=Pgp-1=extracellular matrix receptor-III=Hyaluronate receptor | ▲   | ▲    |
| Hs.99029                                               | 1051 CEBPB   | NF-IL6=C/EBP beta                                                 | ▲   | ▲    |
| Hs.100431                                              | 10563 CXCL13 | BLC=BCA-1=B lymphocyte chemoattractant BLC=CXC chemokine          | ▲   | ▲    |
|                                                        | TIMP1        | tissue inhibitor of metalloproteinase 1                           | ▲   | ▲    |
| <b><u>Shared by all experimental groups</u></b>        |              |                                                                   |     |      |
| Hs.227817                                              | 597 BCL2A1   | BCL2-related protein A1                                           | ▲   | ▲    |
| Hs.303649                                              | 6347 CCL2    | MCP-1=MCAF=small inducible cytokine A2=JE=chemokine               | ▲   | ▲    |
| Hs.514107                                              | 6348 CCL3    | Chemokine (C-C motif) ligand 3                                    | ▲   | ▲    |
| Hs.16530                                               | 6362 CCL18   | PARC=DC-CK1=CCchemokine targeting T cells, not monocytes          | ▲   | ▲    |
| Hs.75498                                               | 6364 CCL20   | Chemokine (C-C motif) ligand 20                                   | ▲   | ▲    |
| Hs.443120                                              | 948 CD36     | CD36                                                              | ▼   | ▼    |
| Hs.418123                                              | 1514 CTSL    | cathepsin L                                                       | ▲   | ▲    |
| Hs.78913                                               | 1524 CX3CR1  | CX3CR1=chemokine (C-X3-C) receptor 1                              | ▲   | ▲    |
| Hs.789                                                 | 2919 CXCL1   | GRO1=GRO alpha=melanoma growth stimulatory activity               | ▲   | ▲    |
| Hs.590921                                              | 2920 CXCL2   | Chemokine (C-X-C motif) ligand 2                                  | ▲   | ▲    |
|                                                        | HM74         | putative chemokine receptor; GTP-binding protein                  | ▲   | ▲    |
| Hs.1722                                                | 3552 IL1A    | Interleukin 1, alpha                                              | ▲   | ▲    |
| Hs.126256                                              | 3553 IL1B    | Interleukin 1, beta                                               | ▲   | ▲    |
| Hs.81134                                               | 3557 IL1RN   | Interleukin 1 receptor antagonist                                 | ▲   | ▲    |
|                                                        | IL2RA        | interleukin 2 receptor, alpha                                     | ▲   | ▲    |
| Hs.130210                                              | 3569 IL6     | IL-6                                                              | ▲   | ▲    |
| Hs.624                                                 | IL8          | Interleukin 8                                                     | ▲   | ▲    |
| Hs.515247                                              | 3718 JAK3    | Janus kinase 3 (a protein tyrosine kinase, leukocyte)             | ▲   | ▲    |
| Hs.699154                                              | 4067 LYN     | V-yes-1 Yamaguchi sarcoma viral related oncogene homolog          | ▲   | ▲    |
| Hs.81328                                               | 4792 NFKBIA  | IκB alpha                                                         | ▲   | ▲    |
| Hs.489615                                              | 10135 PBEF1  | Pre-B-cell colony enhancing factor 1                              | ▲   | ▲    |
| Hs.491582                                              | 5327 PLAT    | Plasminogen activator, tissue                                     | ▲   | ▲    |
| Hs.466871                                              | 5329 PLAUR   | Plasminogen activator, urokinase receptor                         | ▲   | ▲    |
| Hs.196384                                              | 5743 PTGS2   | Prostaglandin-endoperoxide synthase 2                             | ▲   | ▲    |
| <b><u>Specific to HIV patients</u></b>                 |              |                                                                   |     |      |
| Hs.631659                                              | 920 CD4      | CD4 molecule                                                      | ▼   | ▼    |
| Hs.181301                                              | 1520 CTSS    | Cathepsin S                                                       | ▼   | ▼    |
| Hs.444105                                              | 953 ENTPD1   | CD39                                                              | ▼   | ▼    |
| Hs.514220                                              | 2896 GRN     | Granulin                                                          | ▼   | ▼    |
| Hs.591967                                              | 10068 IL18BP | Interleukin 18 binding protein                                    | ▼   | ▼    |
| Hs.653138                                              | 9450 LY86    | Lymphocyte antigen 86                                             | ▼   | ▼    |
| Hs.2256                                                | 4316 MMP7    | Matrix metalloproteinase 7 (matrilysin, uterine)                  | ▲   | ▲    |
| Hs.633514                                              | 7077 TIMP2   | TIMP metalloproteinase inhibitor 2                                | ▼   | ▼    |
| Hs.437322                                              | 7130 TNFAIP6 | Tumor necrosis factor, alpha-induced protein 6                    | ▲   | ▲    |
| <b><u>Specific to HIV patients high viral load</u></b> |              |                                                                   |     |      |
| Hs.534370                                              | 6367 CCL22   | MDC=STCP-1=macrophage-derived chemokine precursor=CC              | ▲   | ▲    |
| <b><u>Specific to HIV patients low viral load</u></b>  |              |                                                                   |     |      |
| Hs.114286                                              | 928 CD9      | CD9 molecule                                                      | ▼   | ▼    |
| Hs.54673                                               | 8741 TNFSF13 | Tumor necrosis factor (ligand) superfamily, member 13             | ▼   | ▼    |
